# Supplementary figures and images for: Inhibition of Viral Pathogenesis and Promotion of the Septic Shock Response to Bacterial Infection by IRF-3 Are Regulated by the Acetylation and Phosphorylation of Its Coactivators
Source: PubMed Central journal article supplement — mBio. 2013 Mar 26;4(2):e00636-12. doi: 10.1128/mBio.00636-12 (PMC3622923; doi:10.1128/mbio.00636-12), 2013-03-26

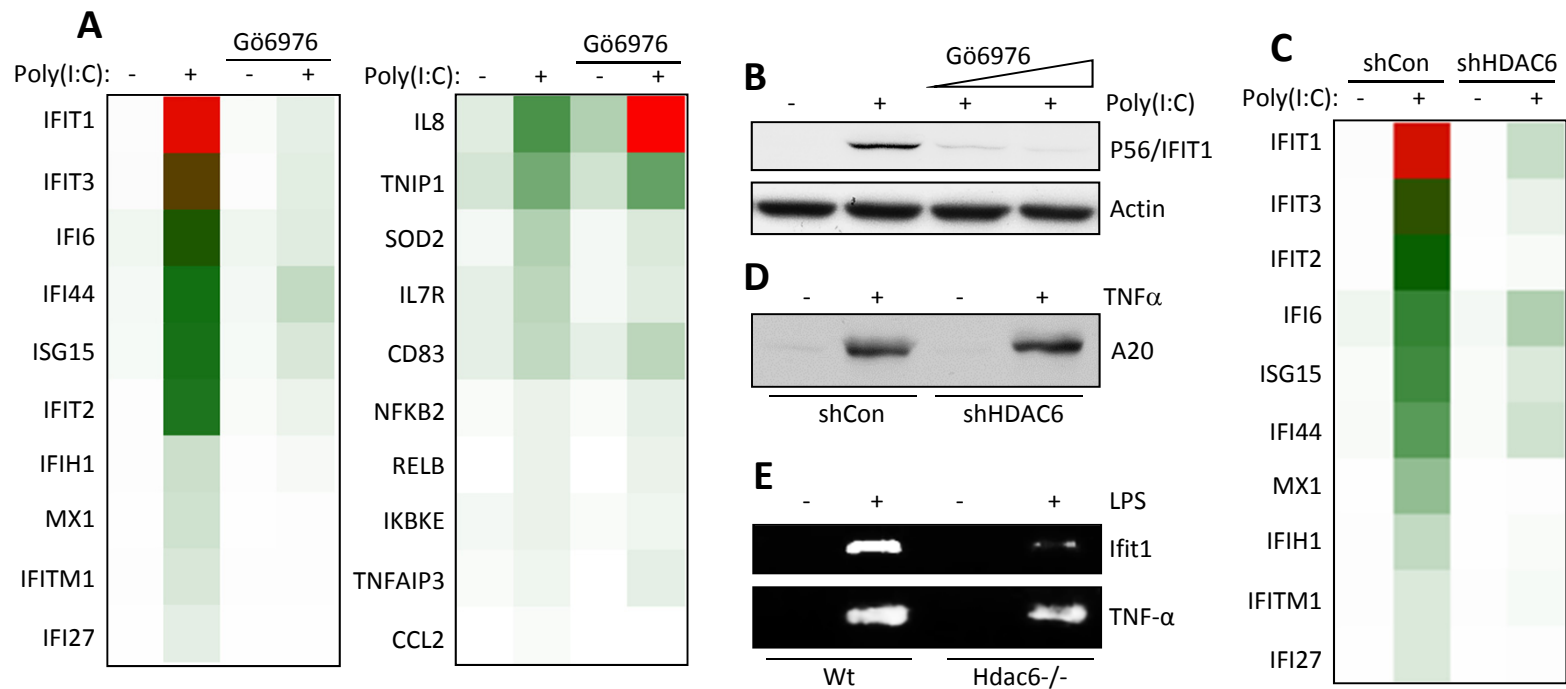

**Figure S1**

Supplement: mbo002131477sf01.pdf [file mbo002131477sf01.pdf]
